# Supplementary material for: Feasibility of Four Interventions to Improve Treatment Adherence in Migrants Living with HIV in The Netherlands
Source: MDPI journal article supplement (doi:10.3390/diagnostics10110980), 2020-11-20
Supplement: s1 [file s1]

**Supplementary Table S1.** Sociodemographic characteristics of patients participating in the peer support intervention.

|                                                 | <b><i>n</i> = 23</b> |
|-------------------------------------------------|----------------------|
| <b>Men (%)</b>                                  | 11 (47.8)            |
| <b>Receiving cART <sup>a</sup></b>              |                      |
| >6 months                                       | 17 (77.3)            |
| <6 months                                       | 1 (4.6)              |
| No cART                                         | 4 (18.2)             |
| <b>HIV-RNA &gt;50 copies/ml (%)<sup>^</sup></b> | 8 (47.1)             |
| <b>Mean age (years, sd)</b>                     | 41.4 (0.51)          |
| <b>Region of origin (%)</b>                     |                      |
| Sub Saharan Africa                              | 11 (47.8)            |
| Caribbean and Central America                   | 6 (26.1)             |
| Latin America                                   | 5 (21.7)             |
| Other                                           | 1 (4.3)              |
| <b>Heterosexual preference (%)</b>              | 17 (73.9)            |
| <b>Educational attainment (%)</b>               |                      |
| No formal education/Primary school              | 7 (30.4)             |
| Secondary school                                | 7 (30.4)             |
| Higher vocational school                        | 6 (26.1)             |
| University                                      | 2 (8.7)              |
| <b>Employment status (%)</b>                    |                      |
| Paid employment                                 | 4 (17.4)             |
| Unemployed                                      | 11 (47.8)            |
| On sick leave                                   | 1 (4.3)              |
| Other                                           | 7 (30.4)             |

<sup>a</sup>One matched patient was previously treated with cART due to an acute HIV-infection, *n* = 22. <sup>^</sup>All matched patients on cART >6 months at inclusion, *n* = 17.
